# Supplementary material for: l-Proline mediated synthesis of quinoxalines; evaluation of cytotoxic and antimicrobial activity
Source: Royal Society of Chemistry journal article supplement (doi:10.1039/c4ra08615e), 2014-01-01

**L-Proline Mediated Synthesis of Quinoxalines; Evaluation of  
Cytotoxic and Antimicrobial Activity**

### <sup>1</sup>H NMR of compound 3a

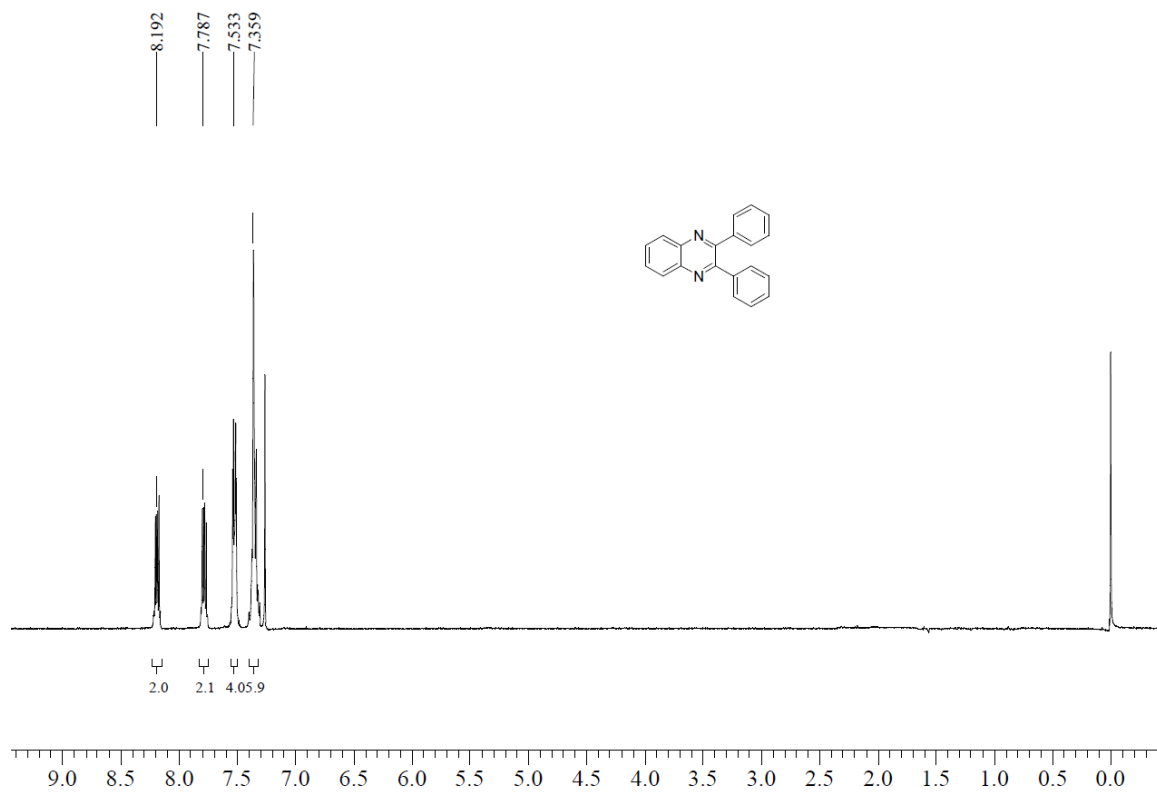

### <sup>13</sup>C NMR of compound 3a

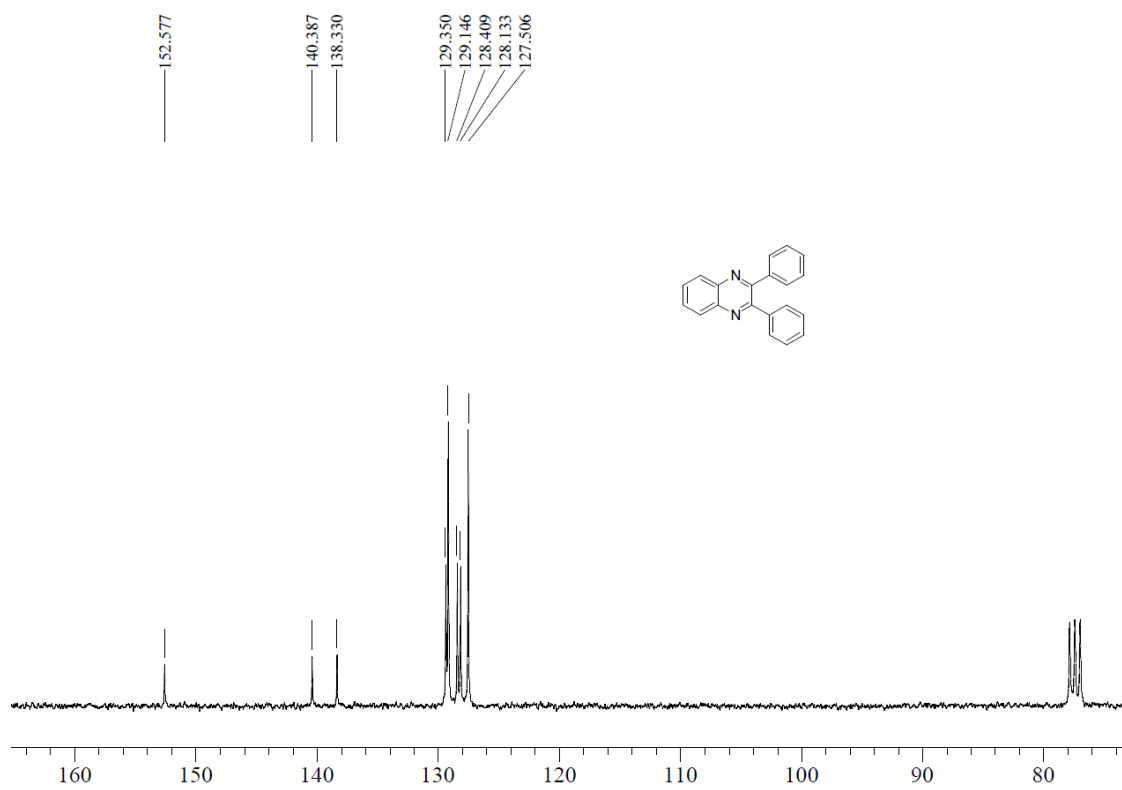

<sup>1</sup>H NMR of compound 3b

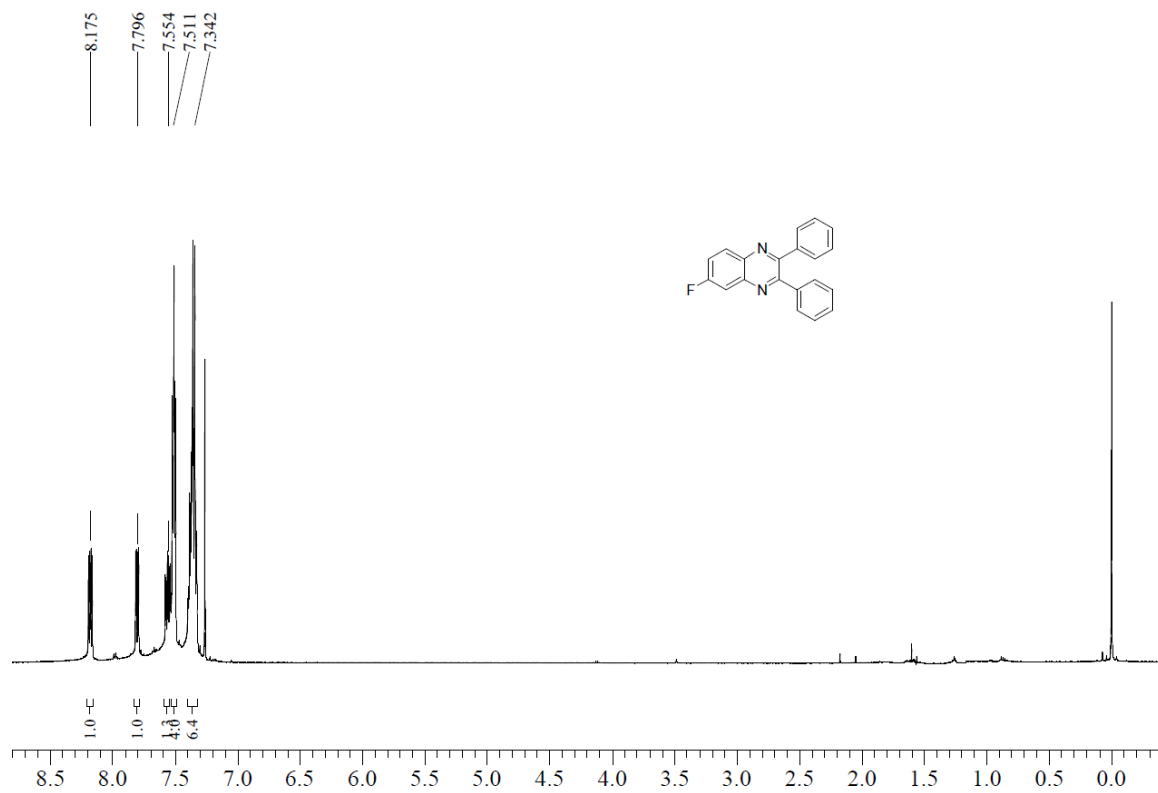

<sup>13</sup>C NMR of compound 3b

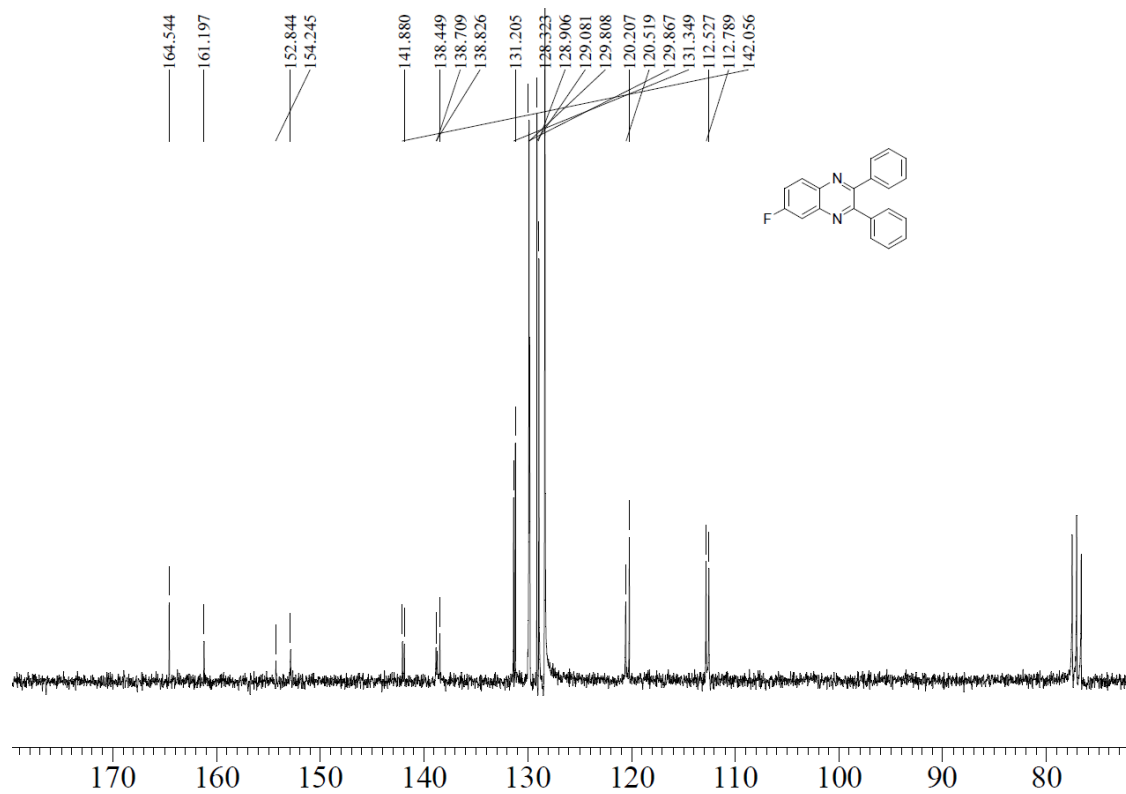

### <sup>1</sup>H NMR of compound 3c

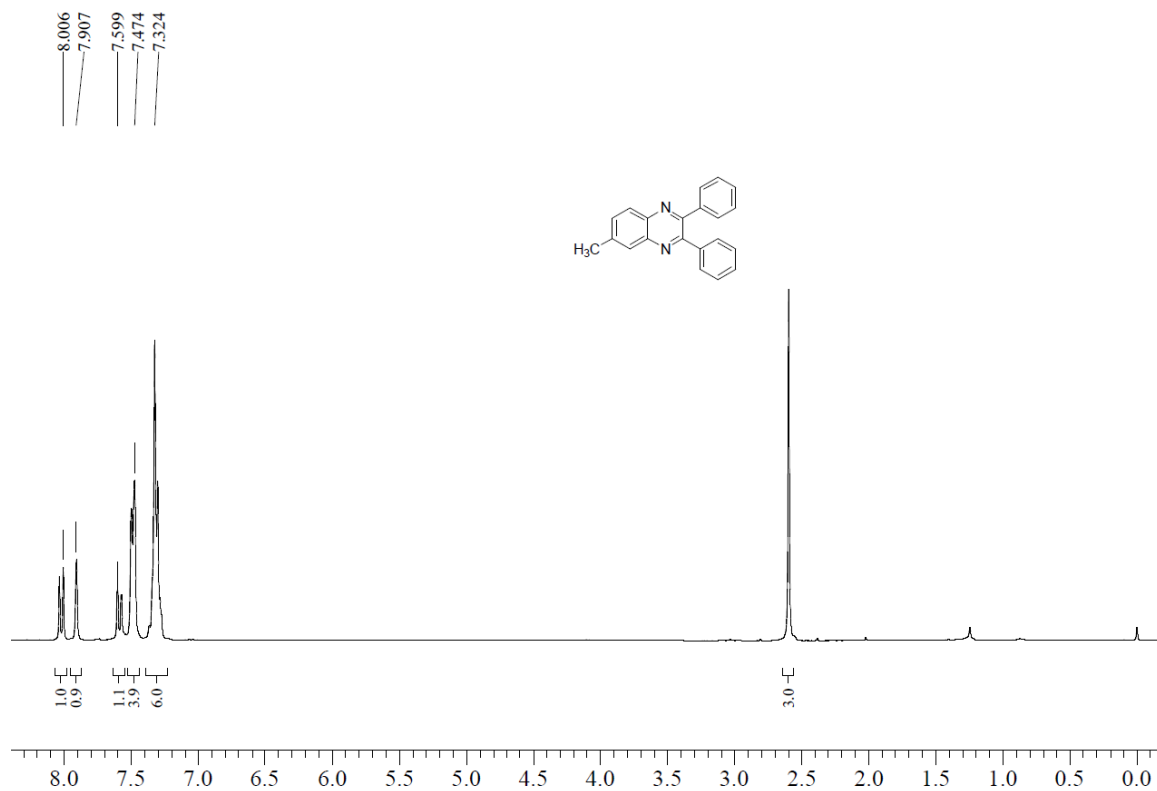

### <sup>13</sup>C NMR of compound 3c

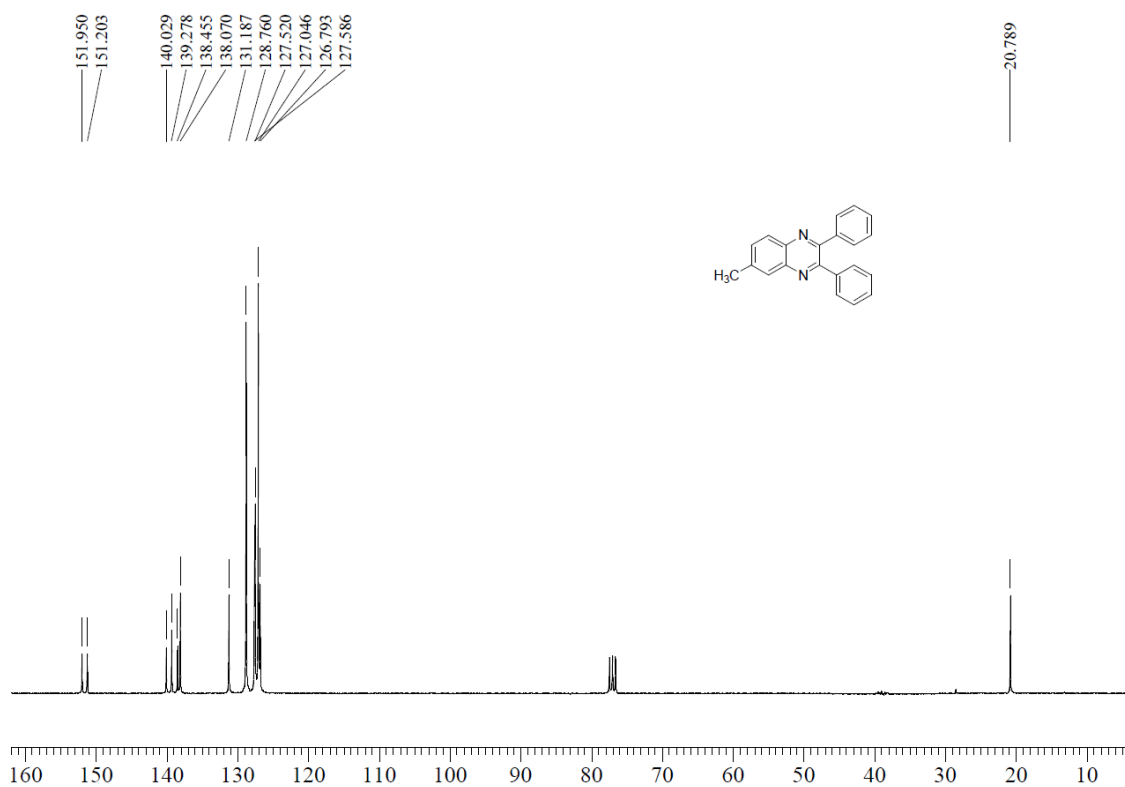

### <sup>1</sup>H NMR of compound 3d

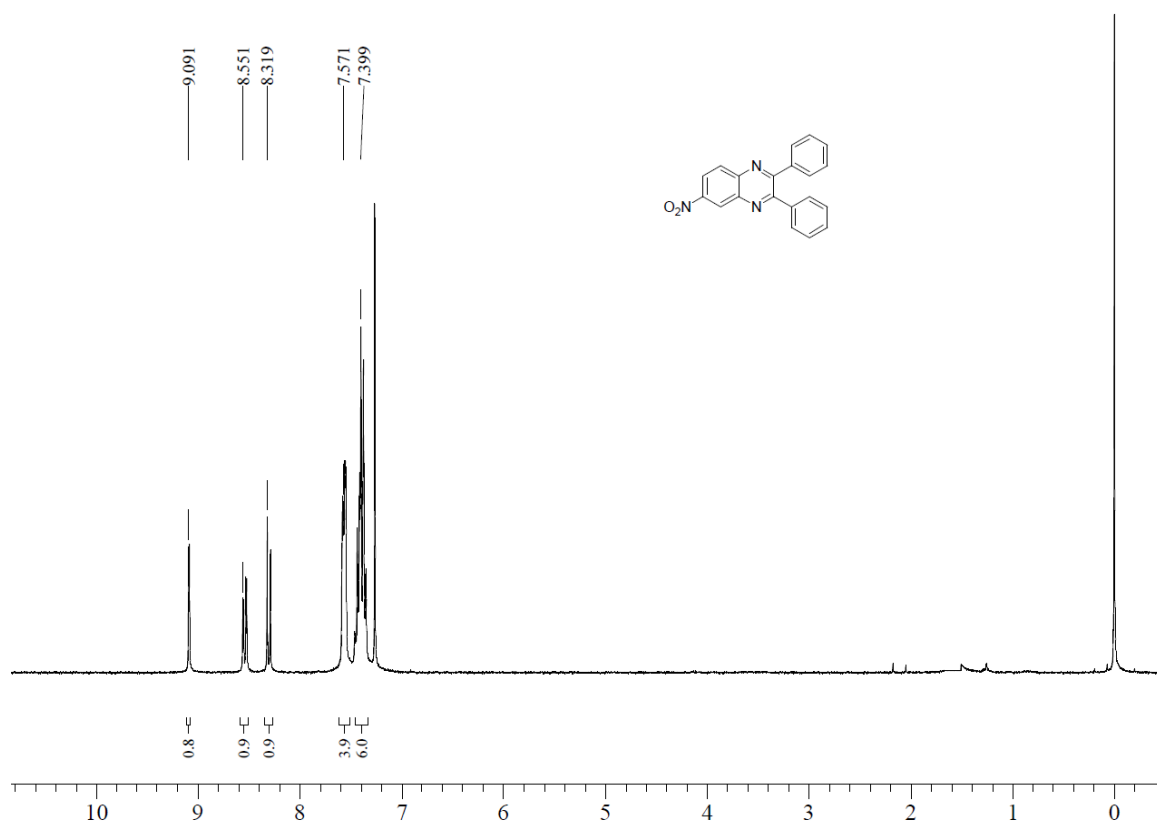

### <sup>13</sup>C NMR of compound 3d

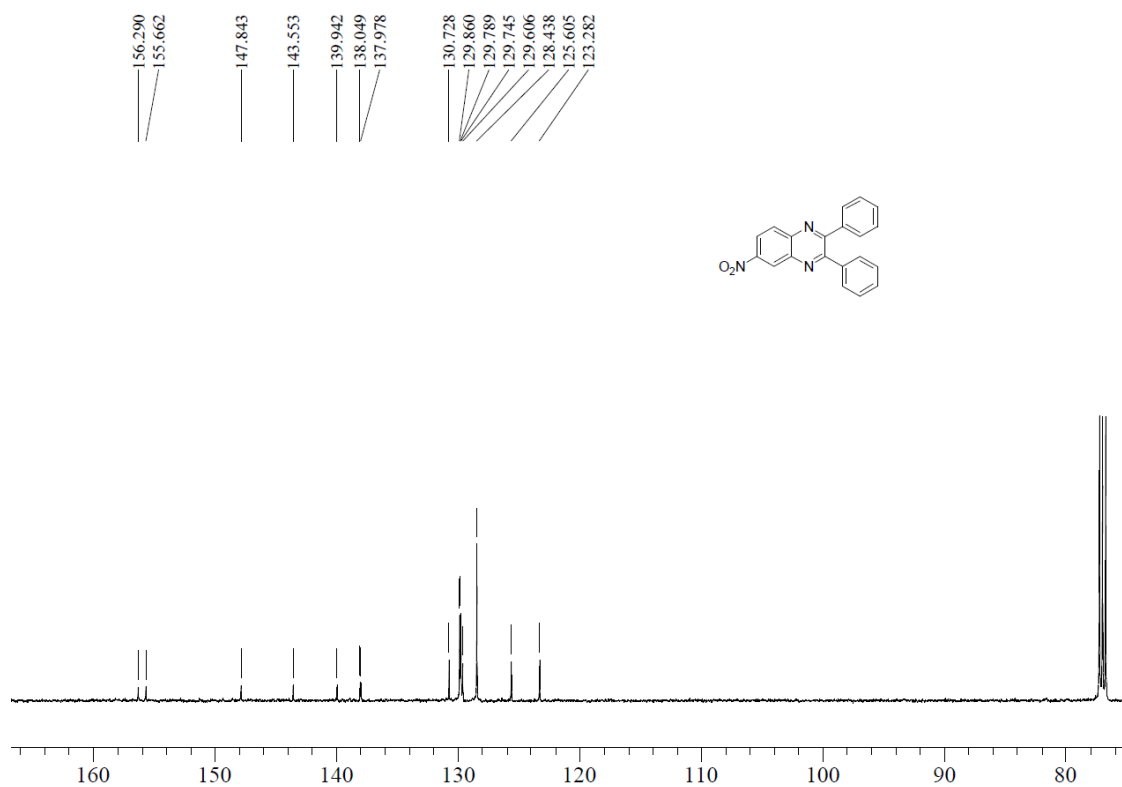

<sup>1</sup>H NMR of compound 3e

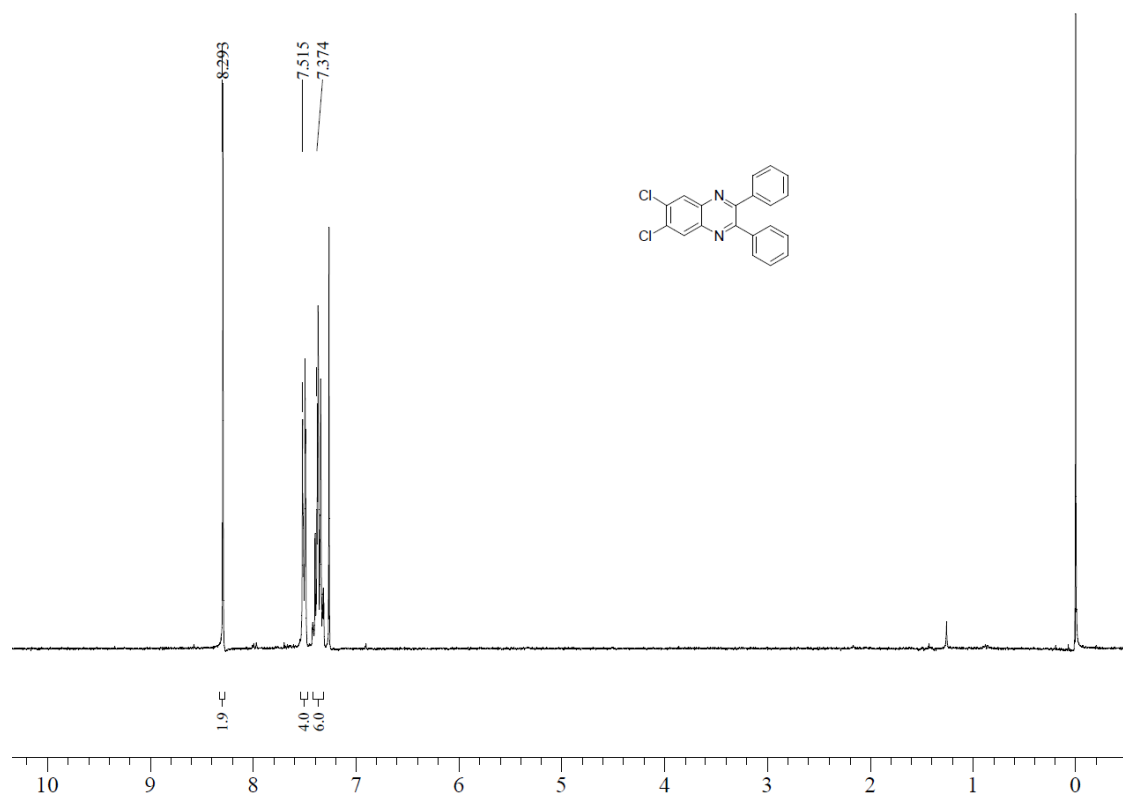

<sup>13</sup>C NMR of compound 3e

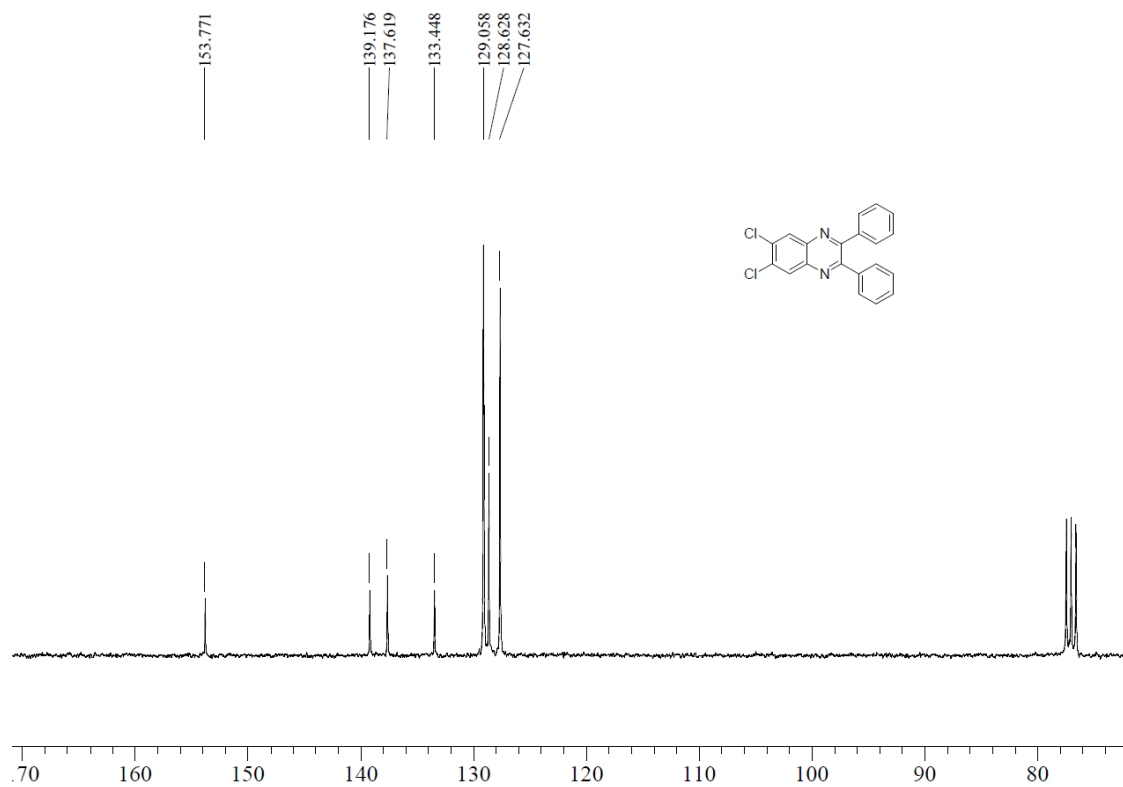

### <sup>1</sup>H NMR of compound 3f

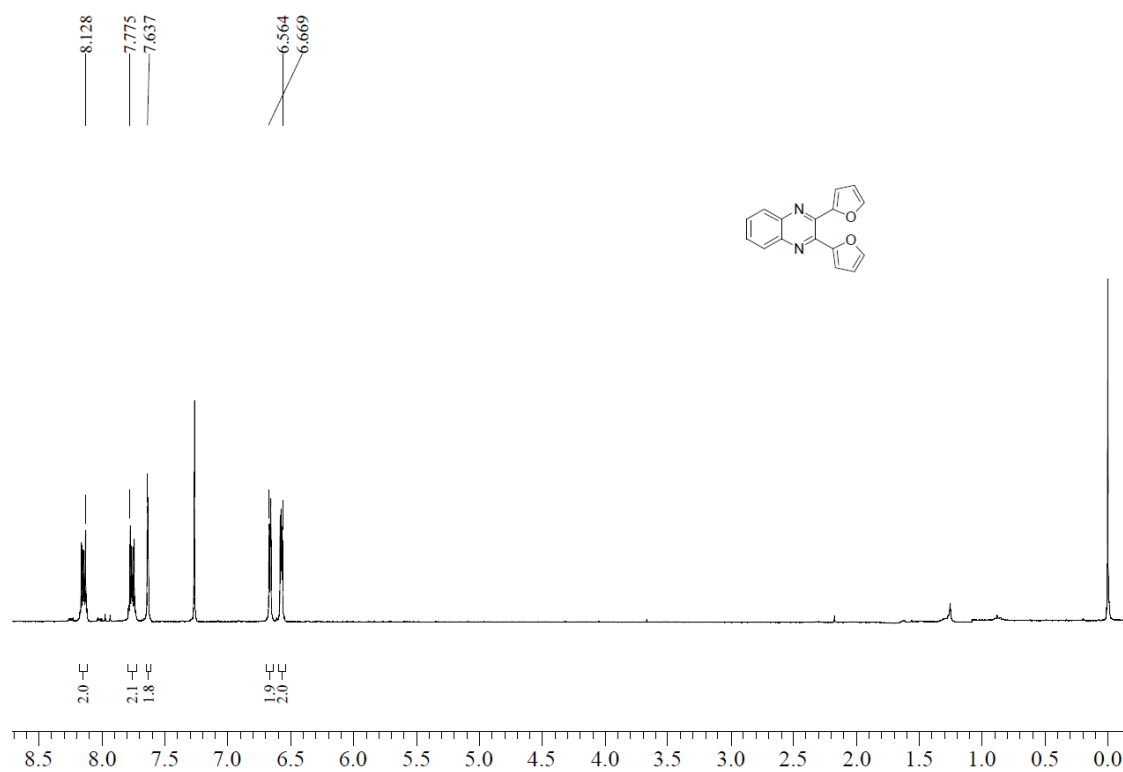

### <sup>13</sup>C NMR of compound 3f

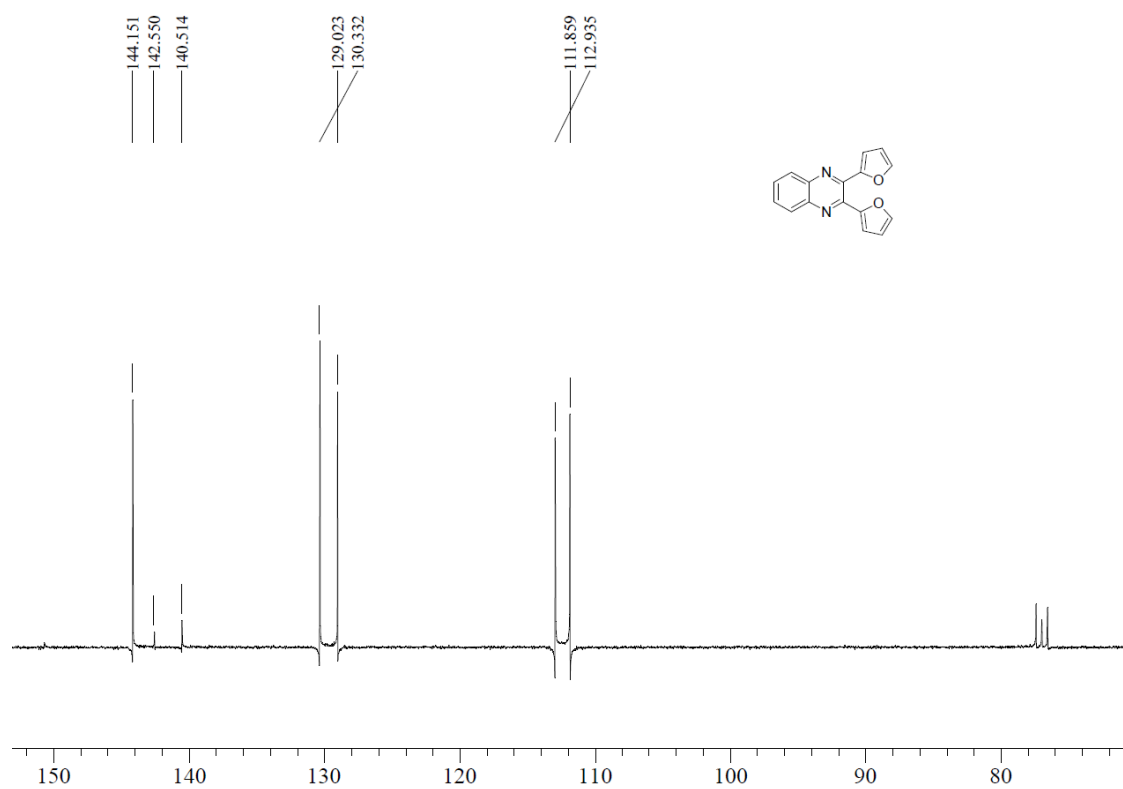

### <sup>1</sup>H NMR of compound 3g

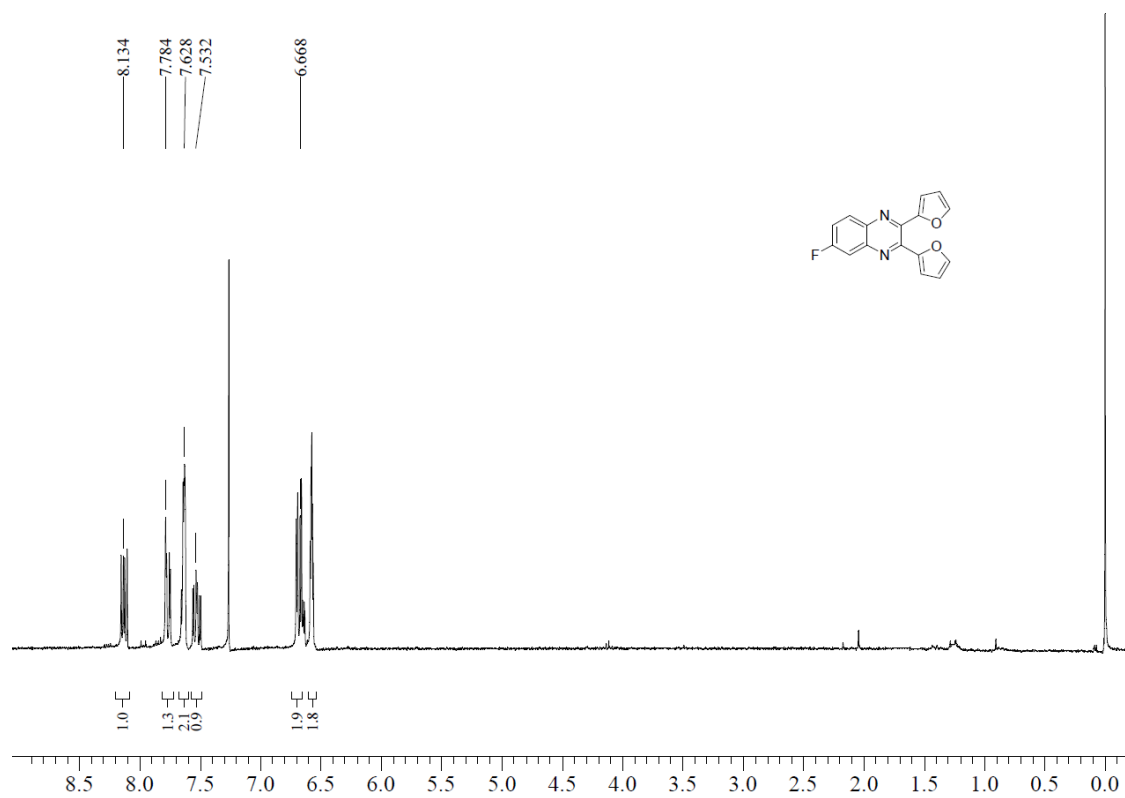

### <sup>13</sup>C NMR of compound 3g

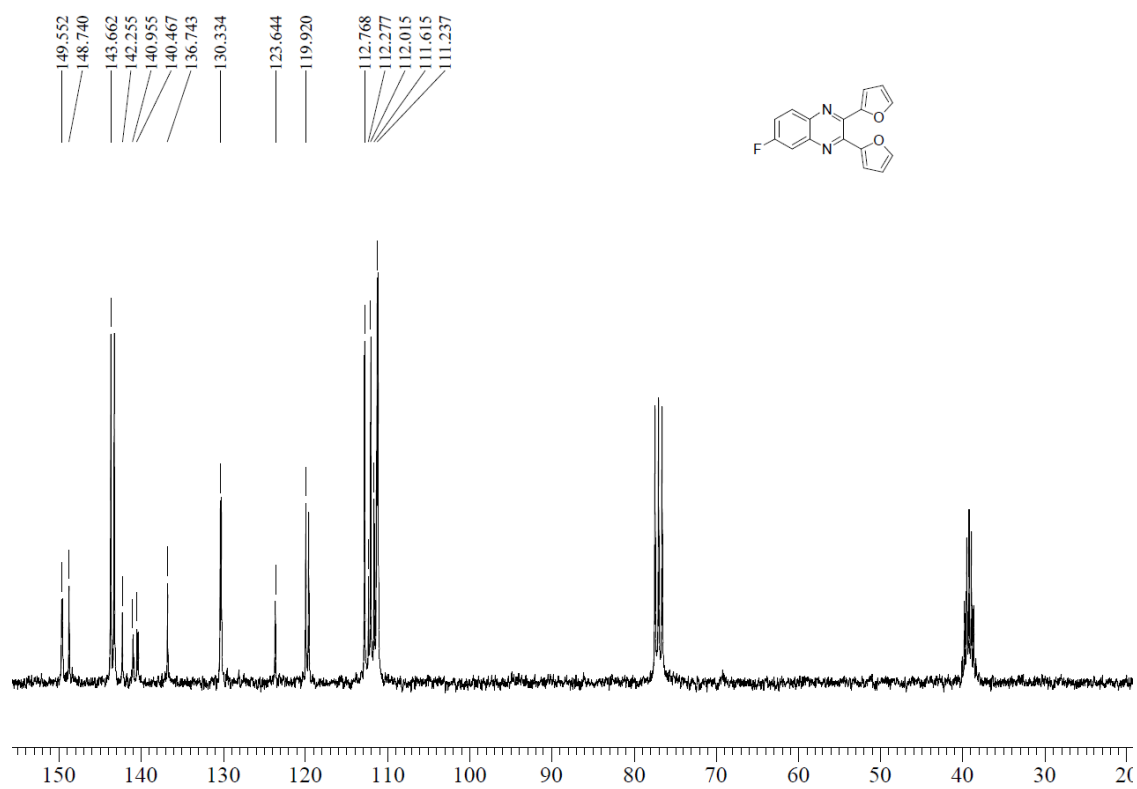



### <sup>1</sup>H NMR of compound 3h

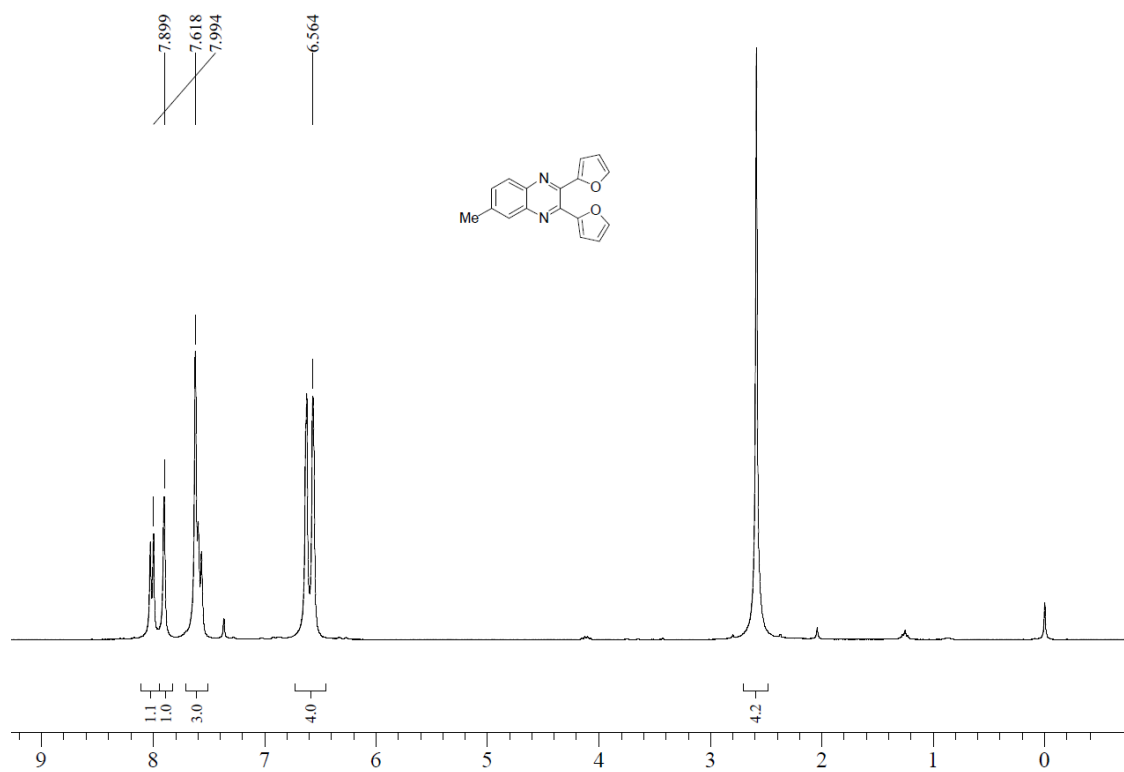

### <sup>13</sup>C NMR of compound 3h

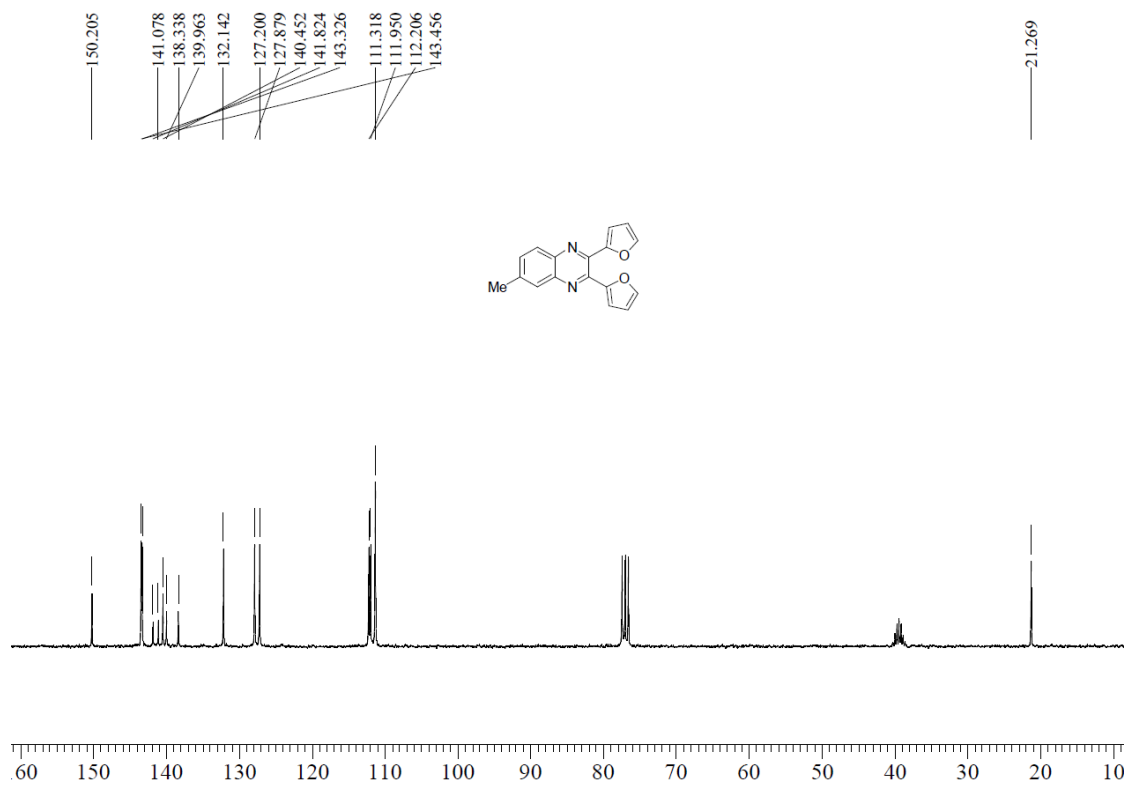

### <sup>1</sup>H NMR of compound 3i

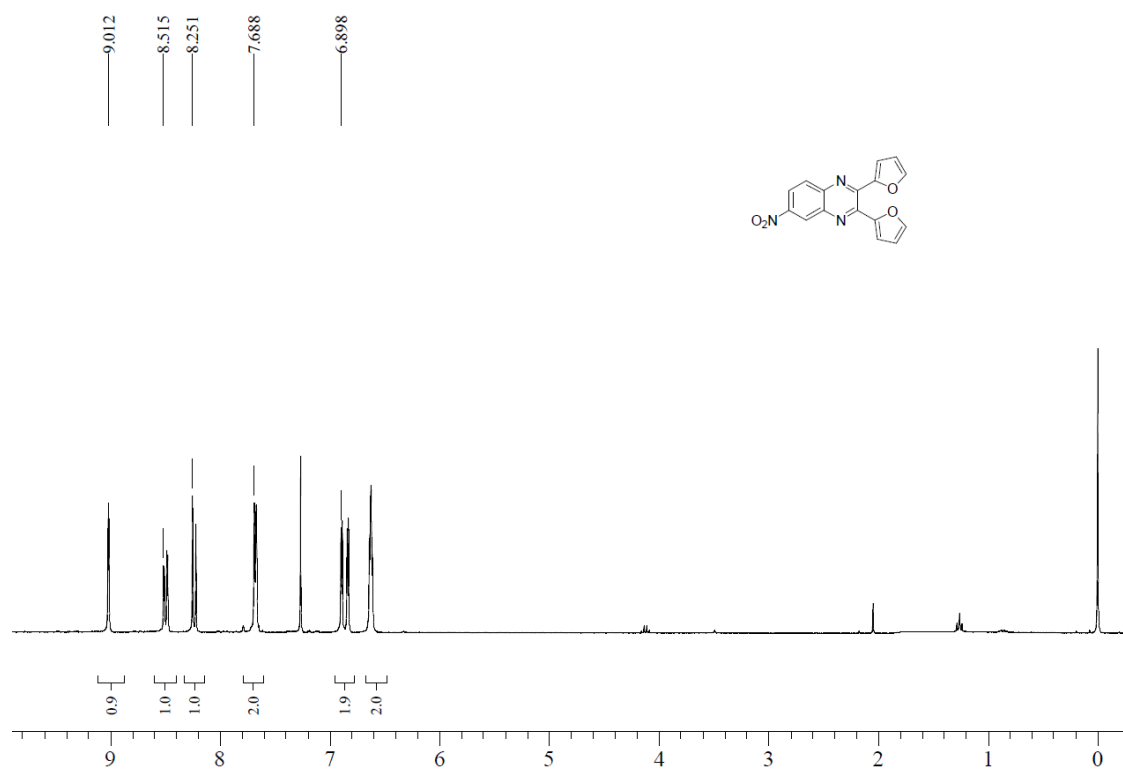

### <sup>13</sup>C NMR of compound 3i

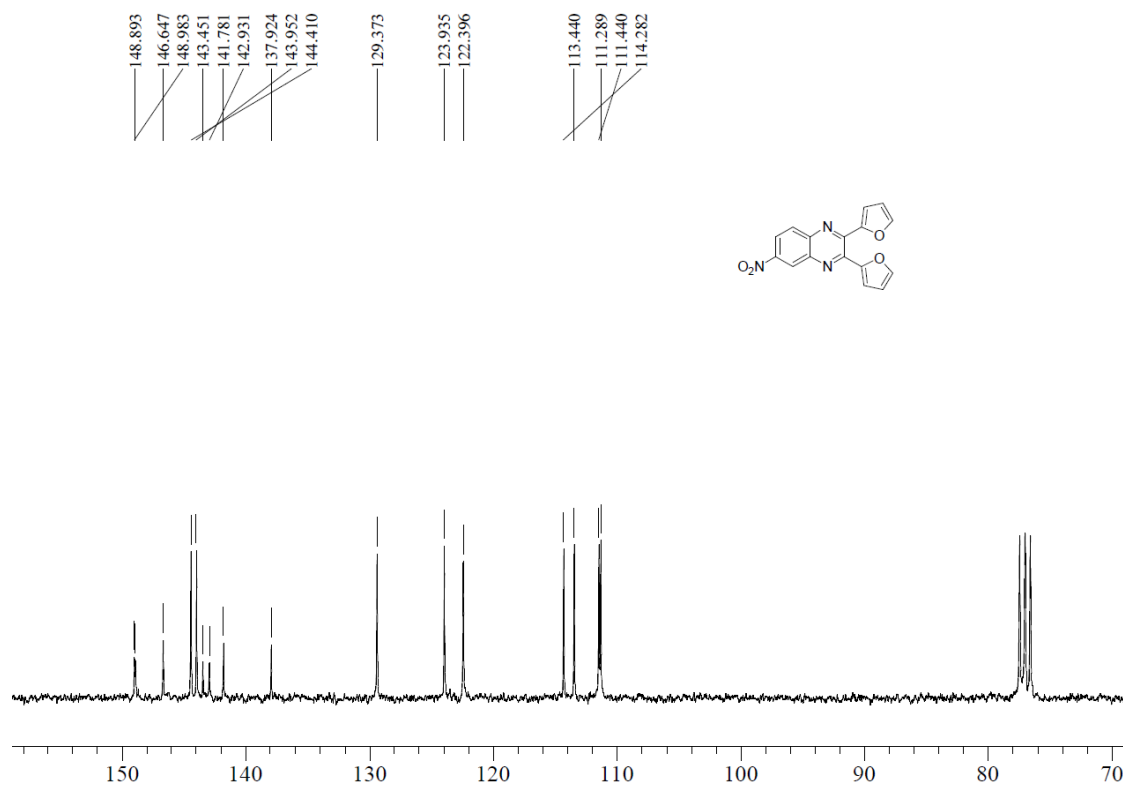

<sup>1</sup>H NMR of compound 3j

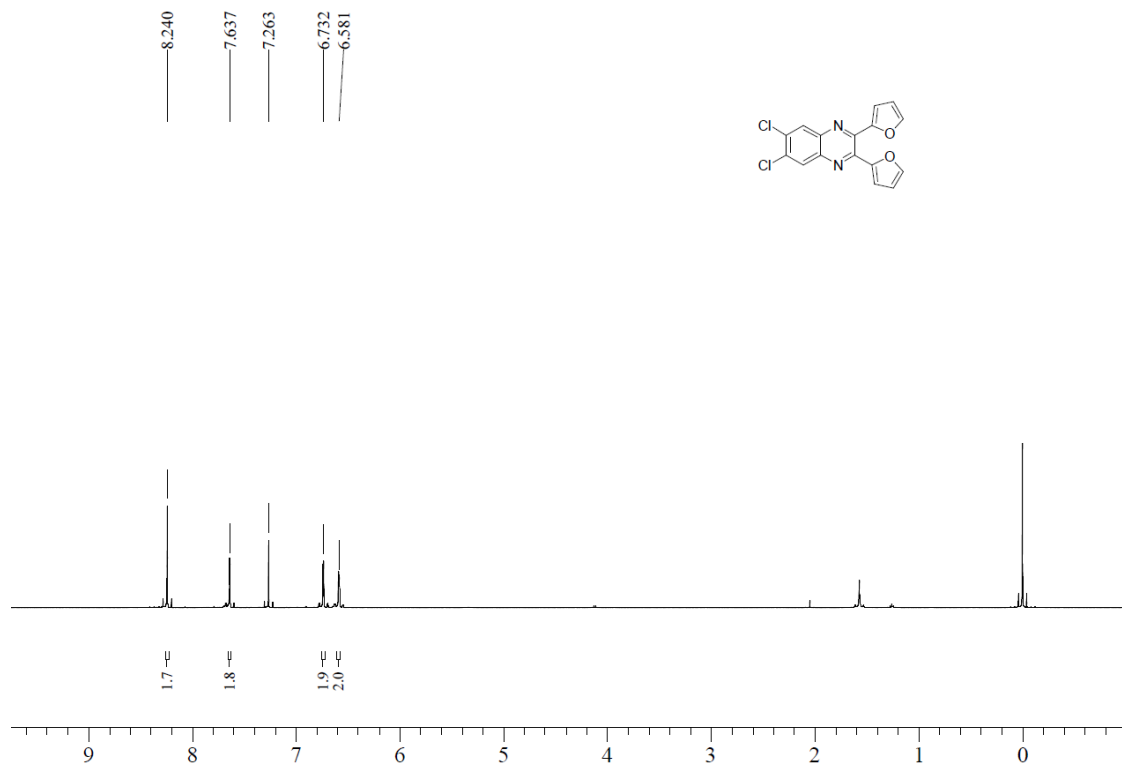

<sup>13</sup>C NMR of compound 3j

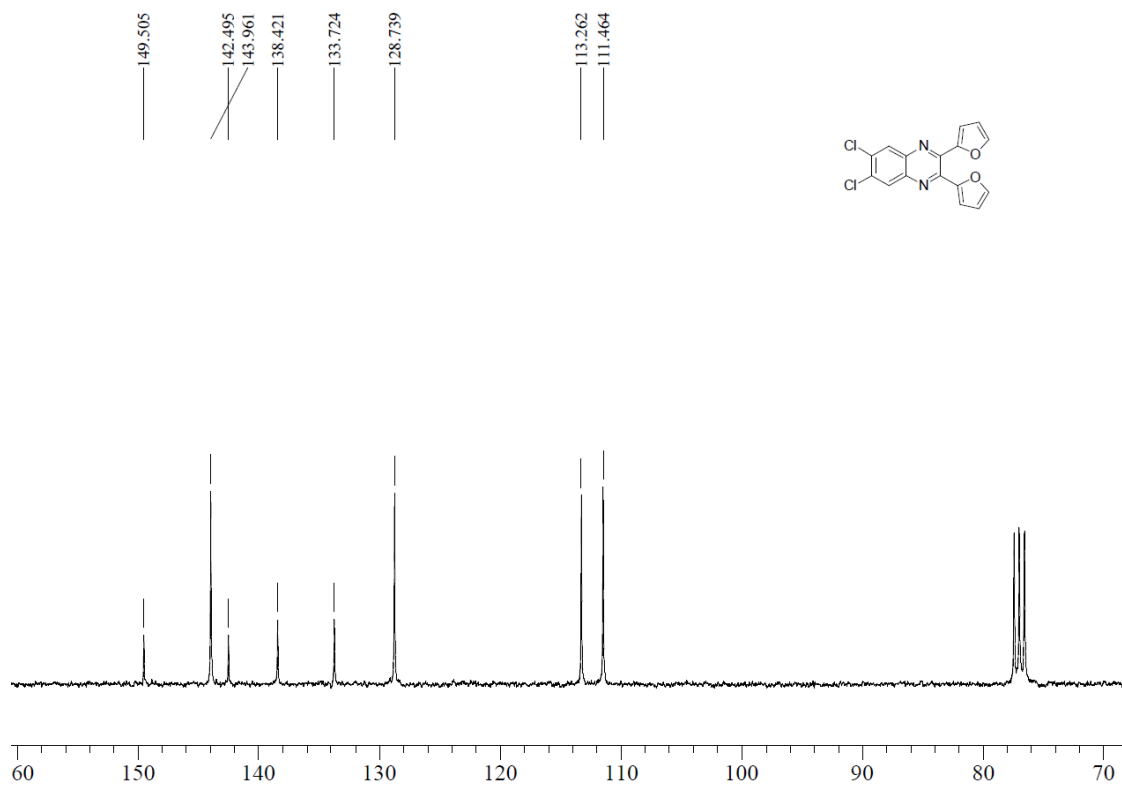

### <sup>1</sup>H NMR of compound 5a

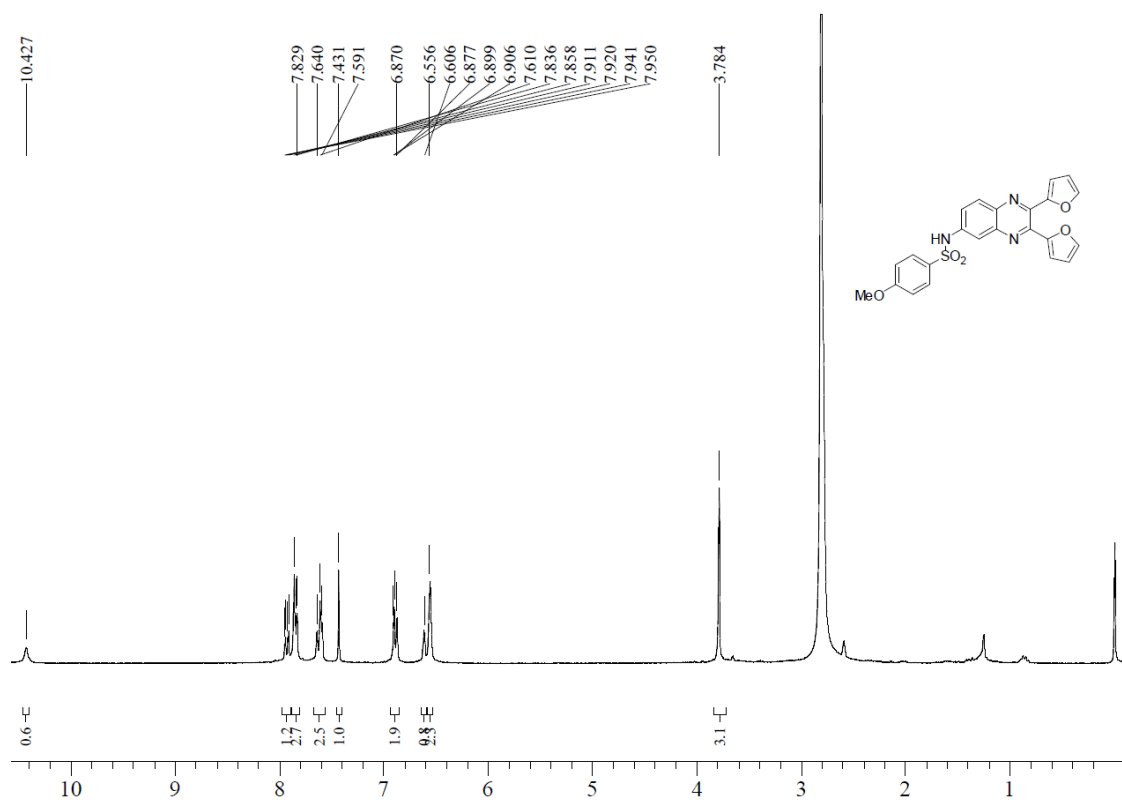

### <sup>1</sup>H NMR of compound 5b

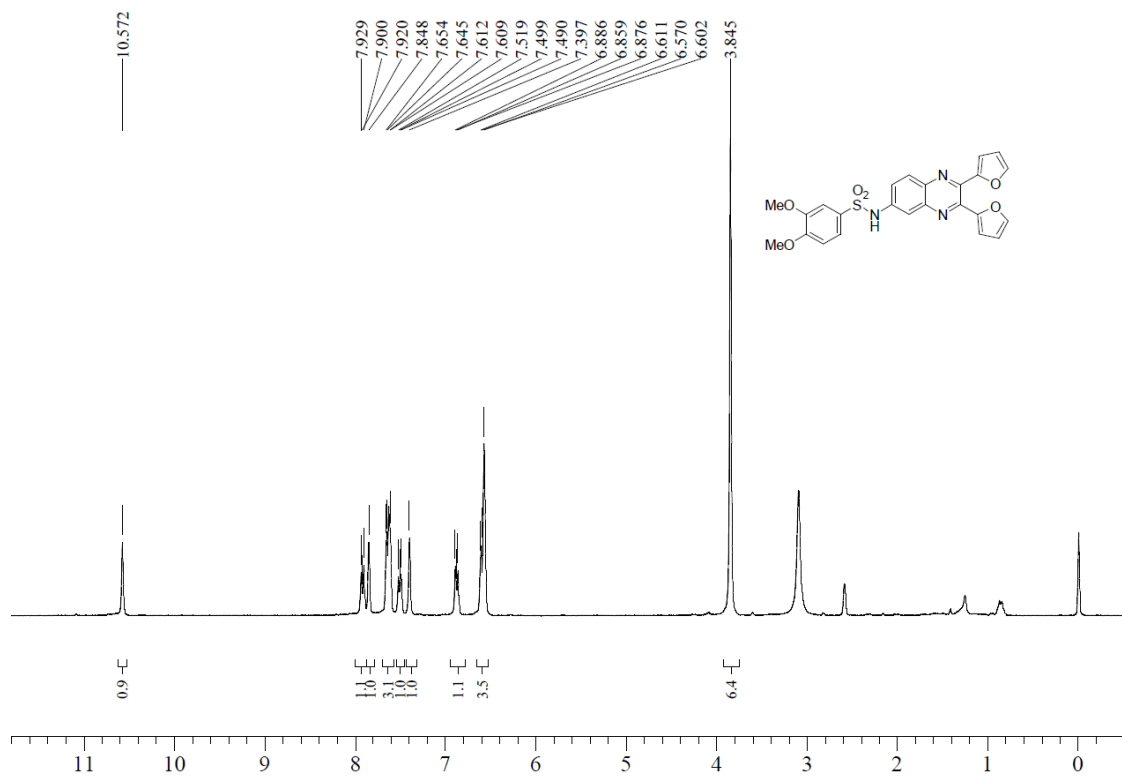

### $^{13}\text{C}$ NMR of compound 5b

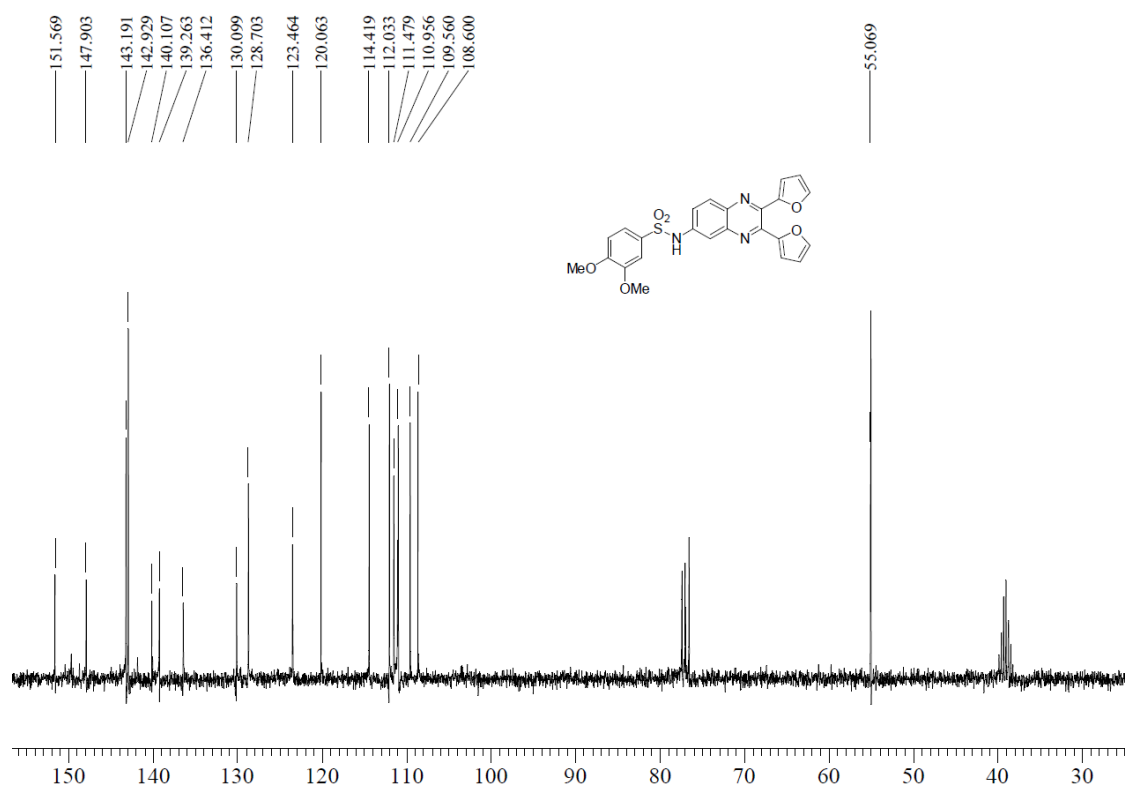

### $^1\text{H}$ NMR of compound 5c

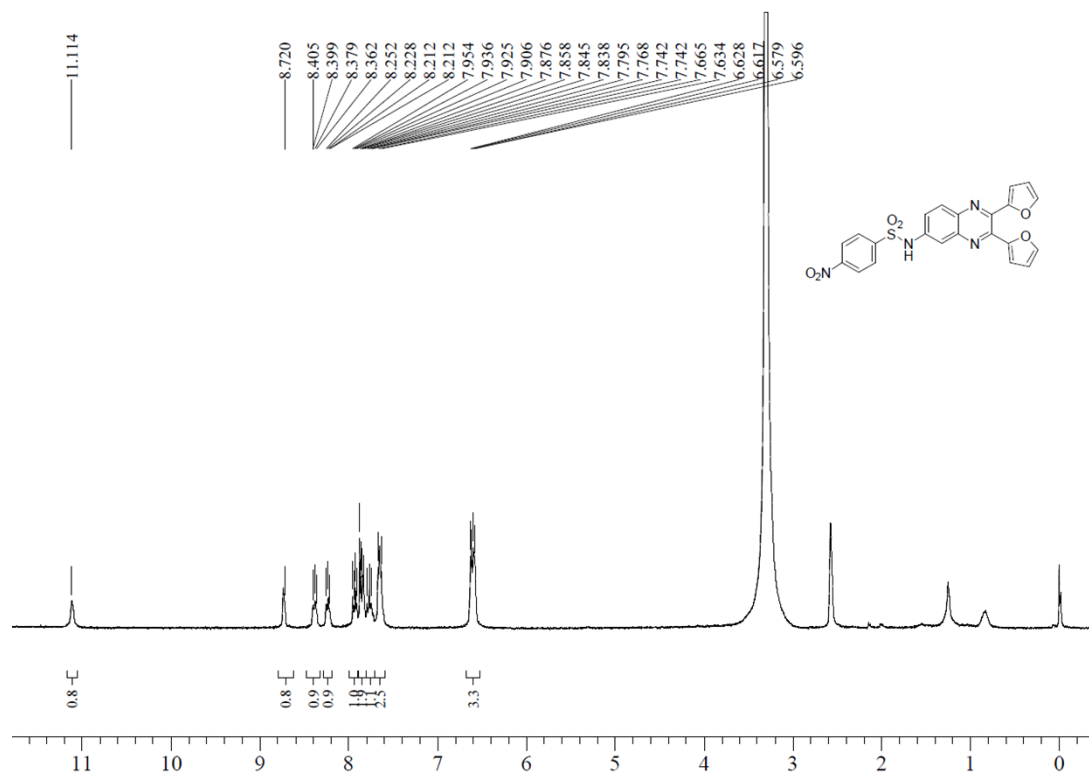

### <sup>13</sup>C NMR of compound 5c

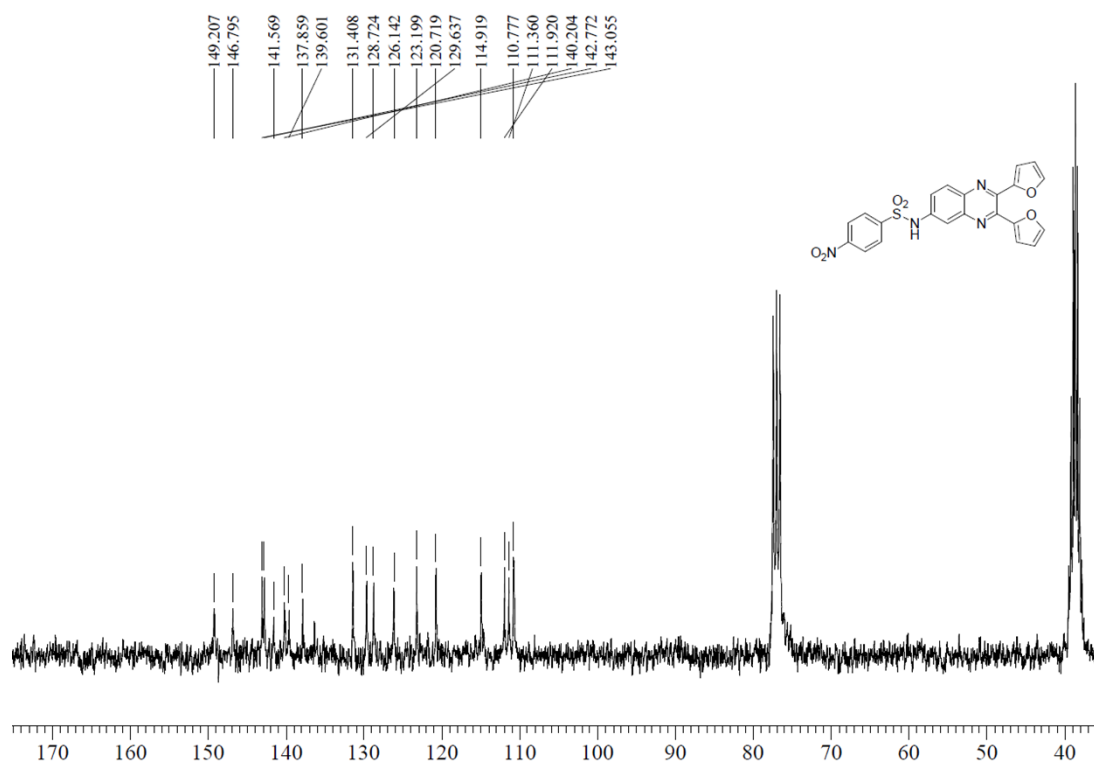

### <sup>1</sup>H NMR of compound 5d

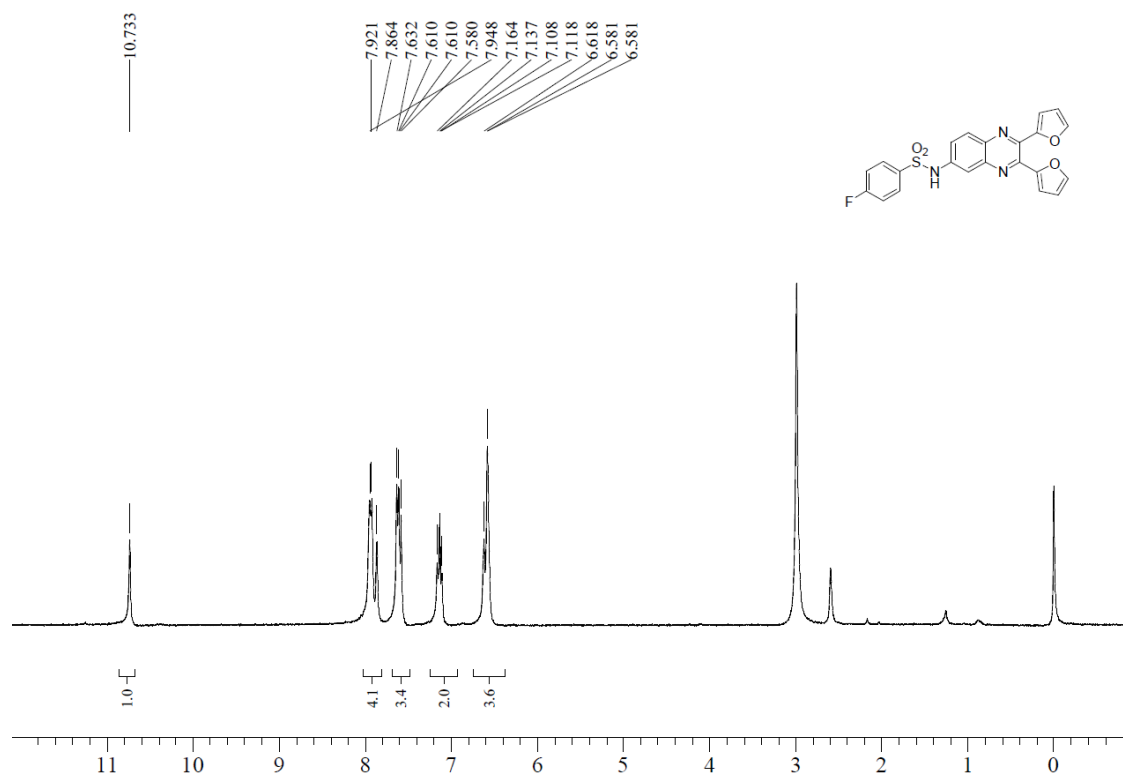

### <sup>13</sup>C NMR of compound 5d

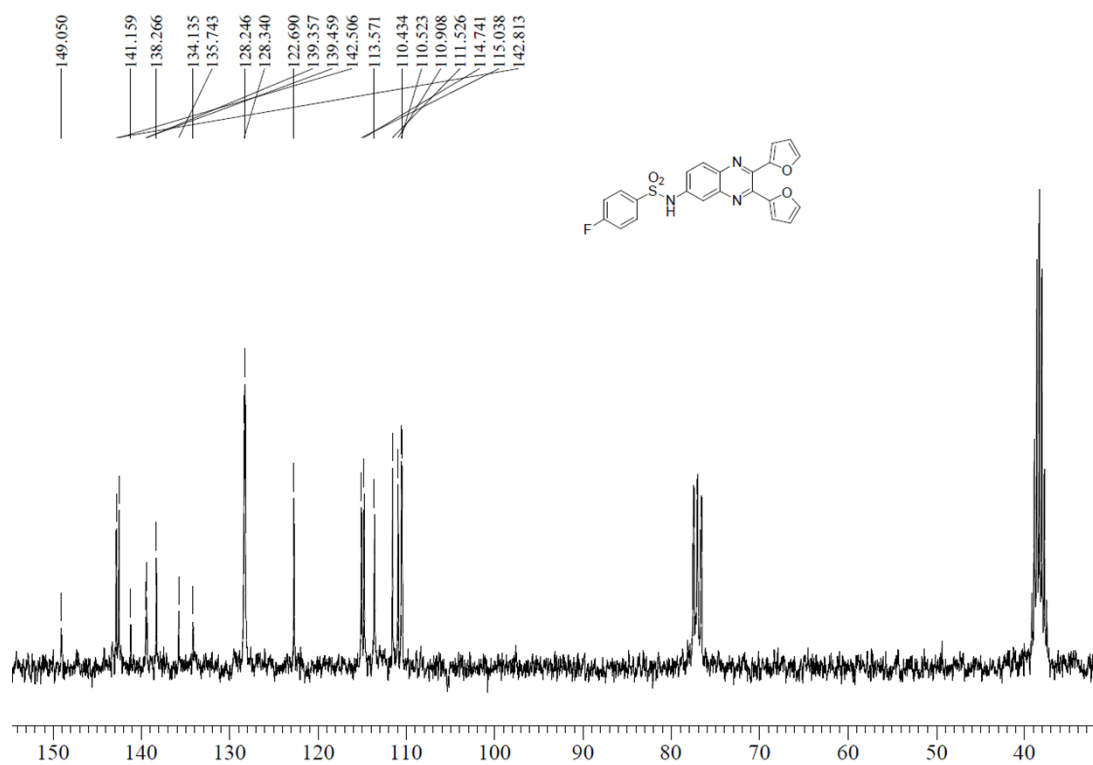

### <sup>1</sup>H NMR of compound 5e

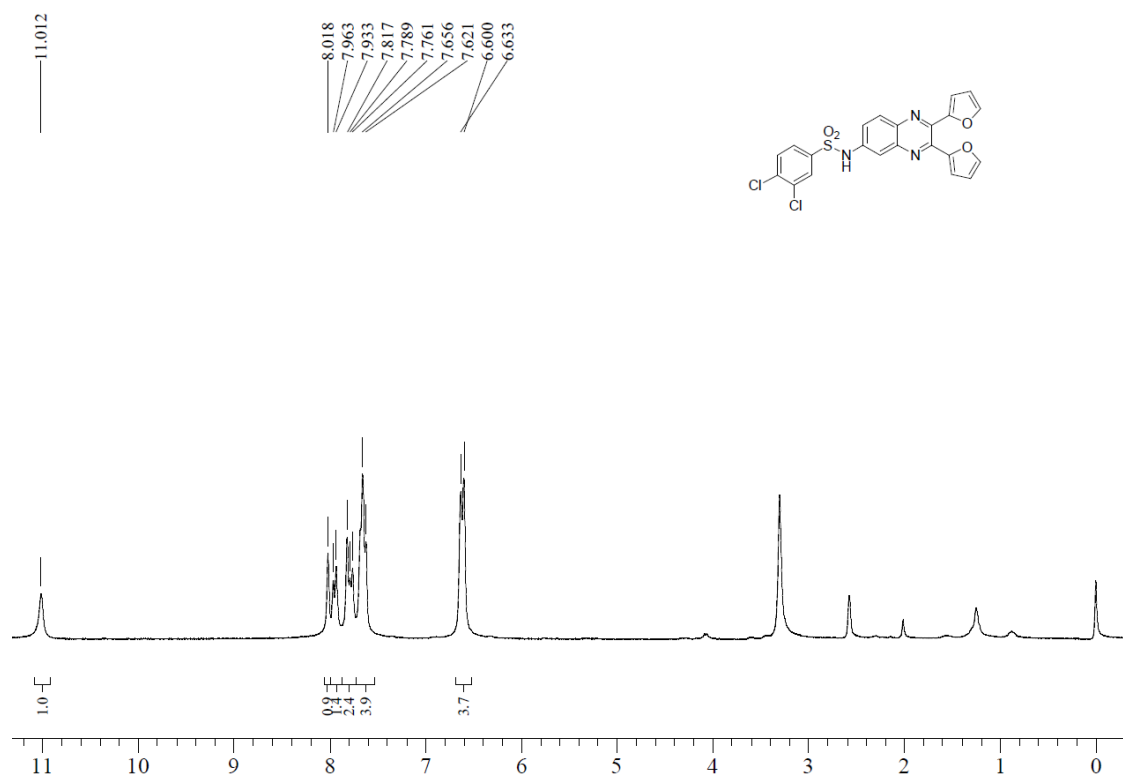

### <sup>13</sup>C NMR of compound 5e

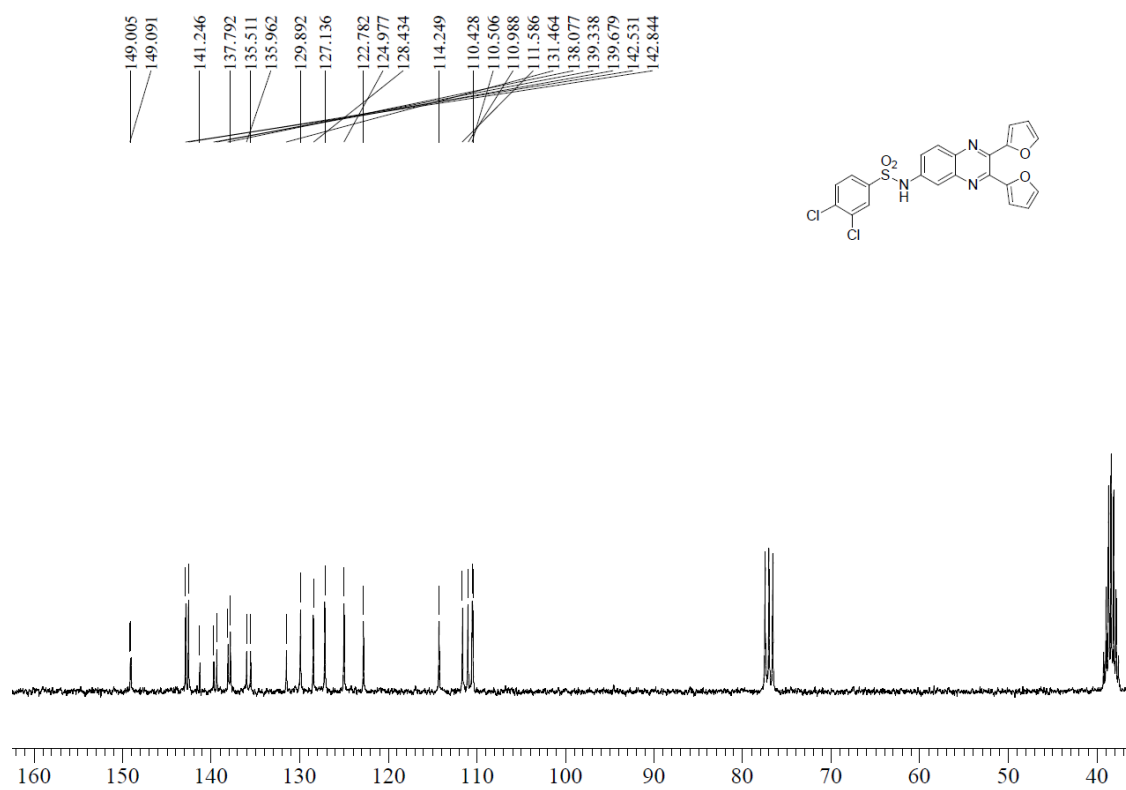

### <sup>1</sup>H NMR of compound 5f

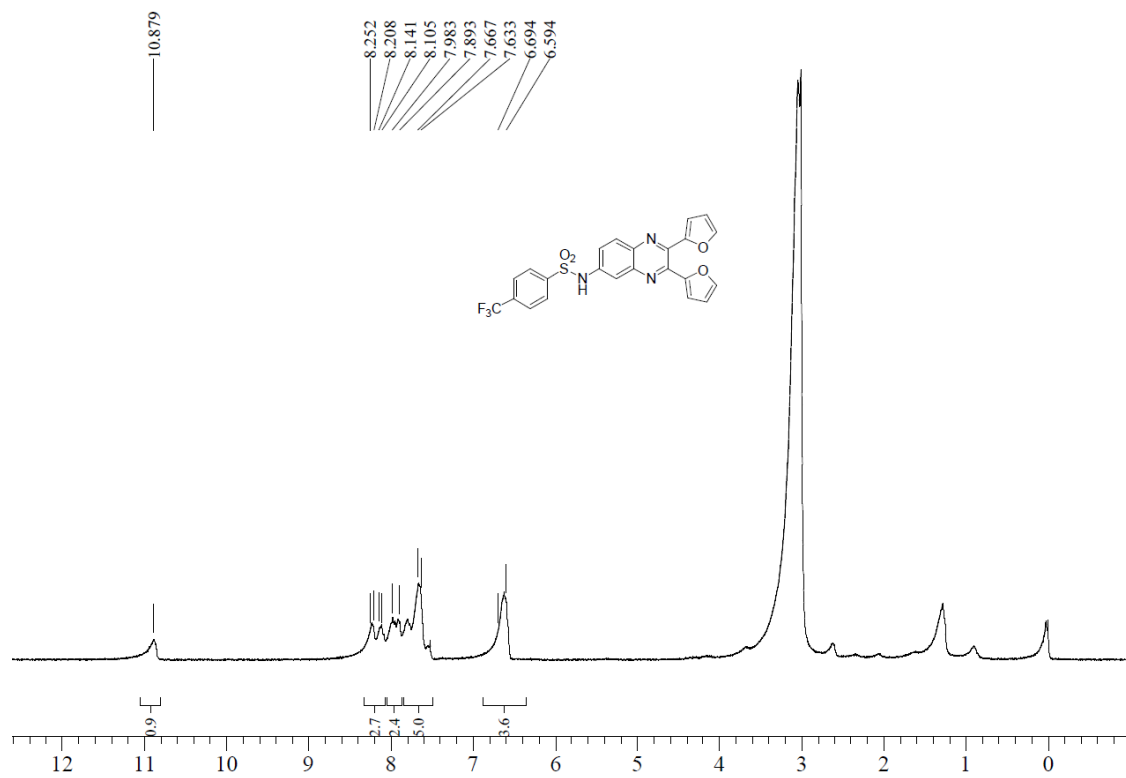

### <sup>13</sup>C NMR of compound 5f



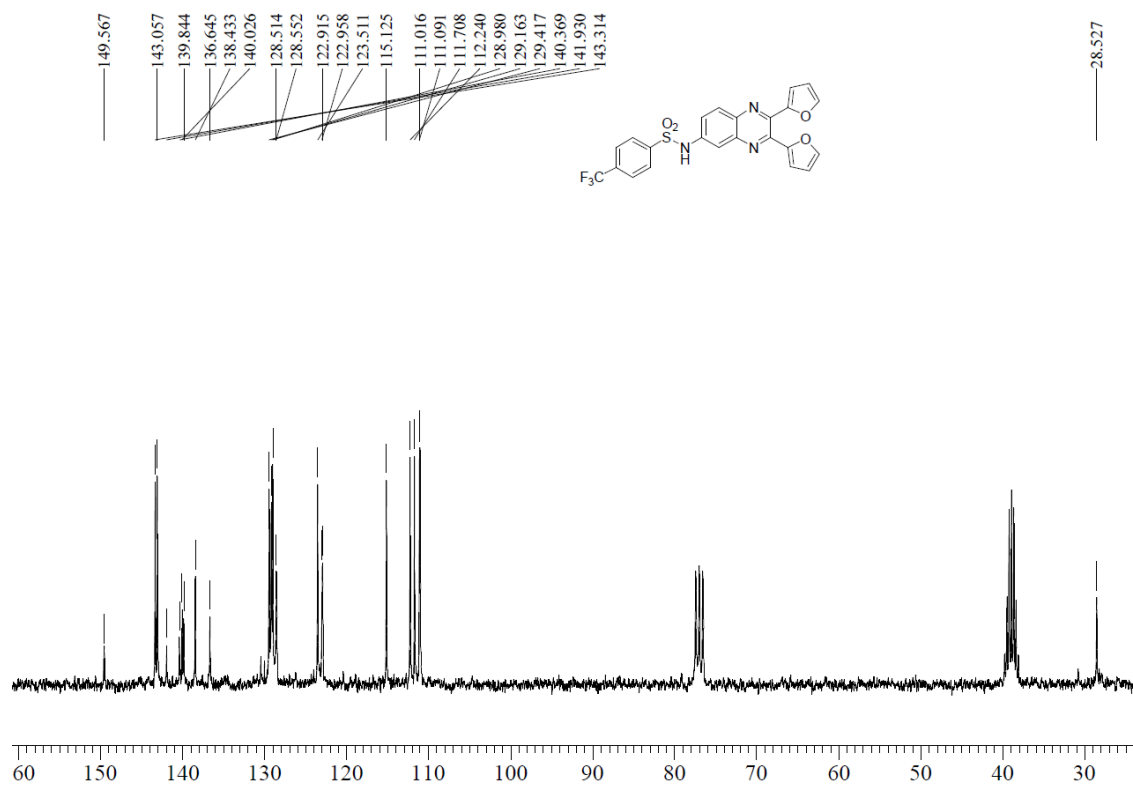

<sup>1</sup>H NMR of compound 5g

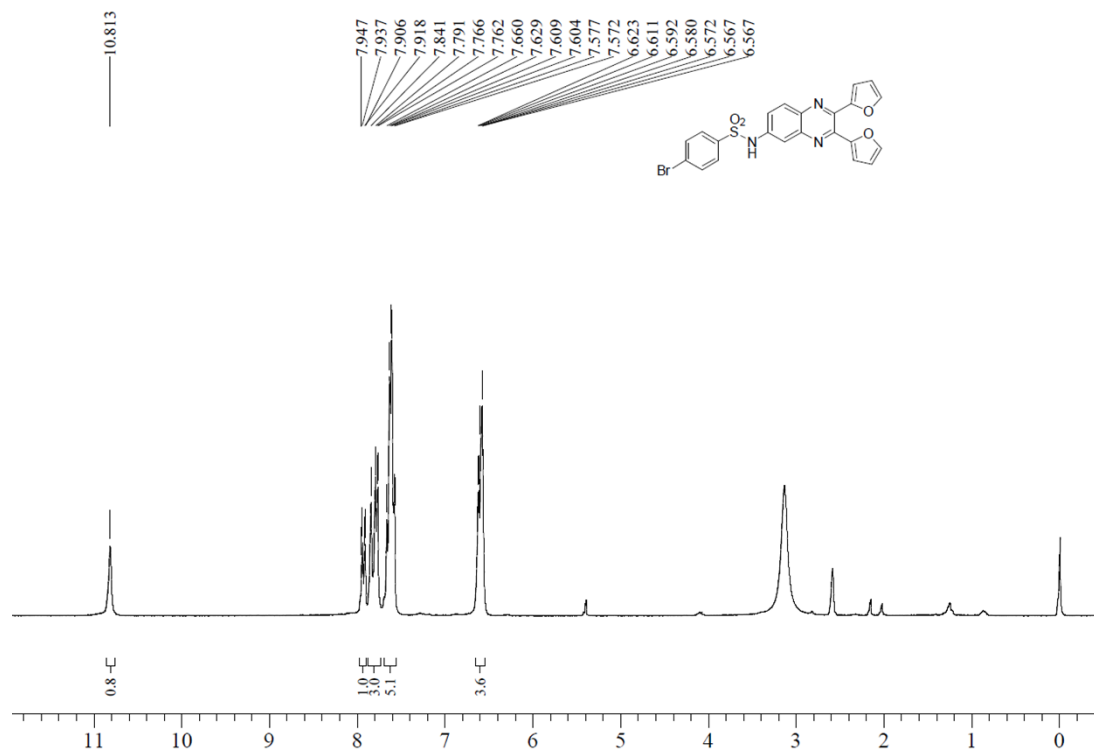

<sup>13</sup>C NMR of compound 5g

149.279  
149.340  
142.700  
139.687  
137.419  
136.151  
138.403  
131.029  
128.571  
126.290  
123.047  
127.369  
139.855  
141.509  
114.205  
110.681  
110.754  
111.245  
111.829  
142.982

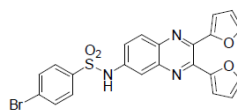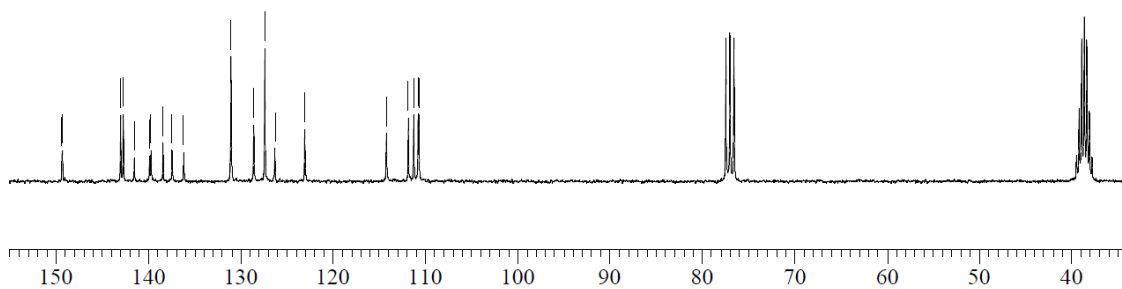

<sup>1</sup>H NMR of compound 5h

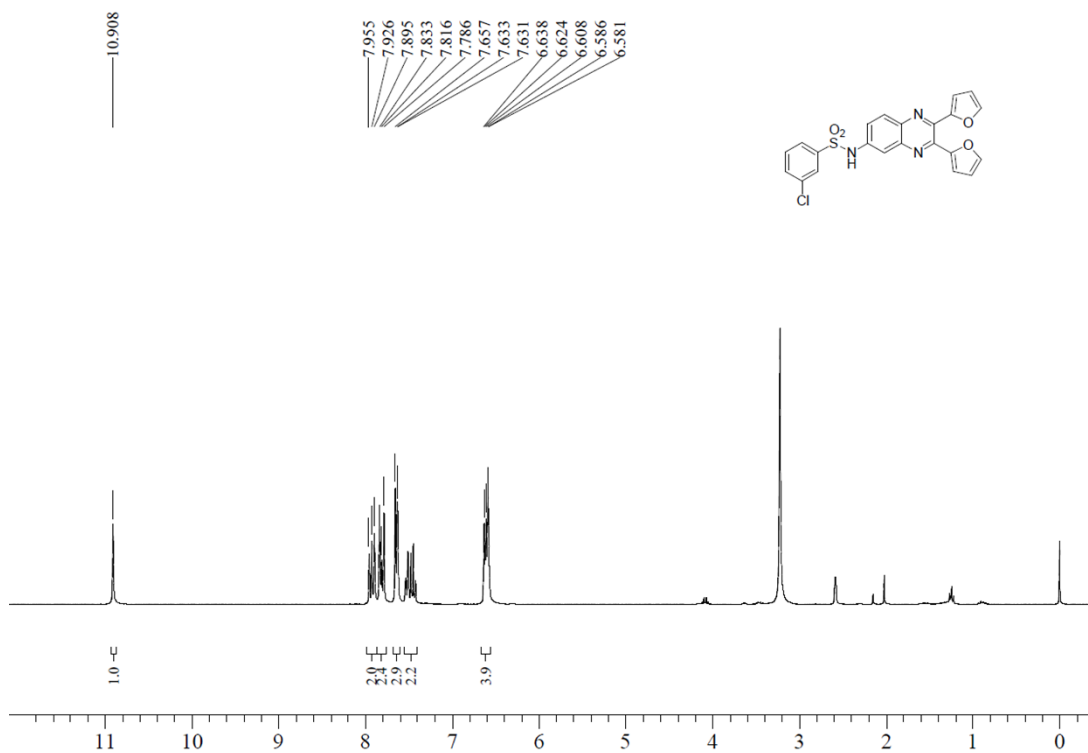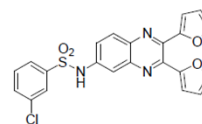

### <sup>13</sup>C NMR of compound 5h

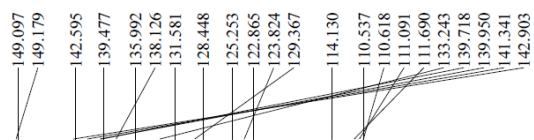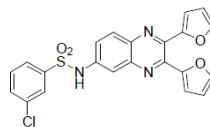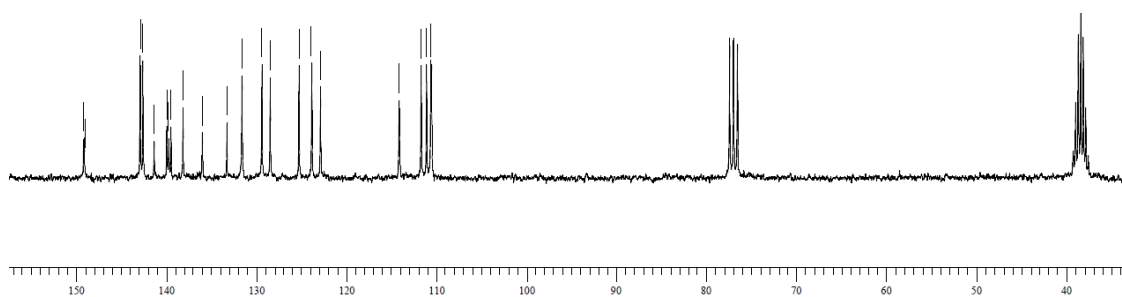

### <sup>1</sup>H NMR of compound 5i

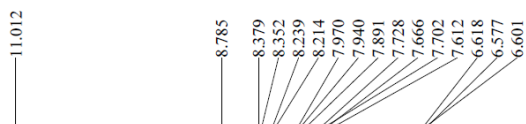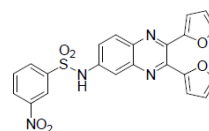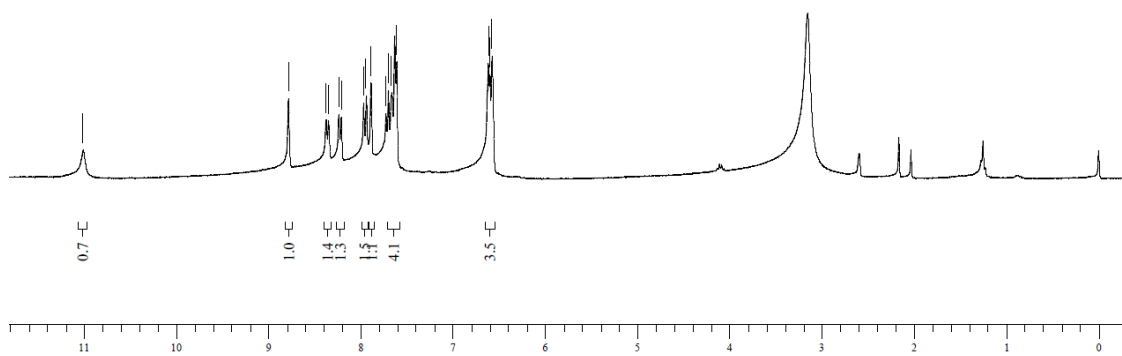

<sup>13</sup>C NMR of compound 5i

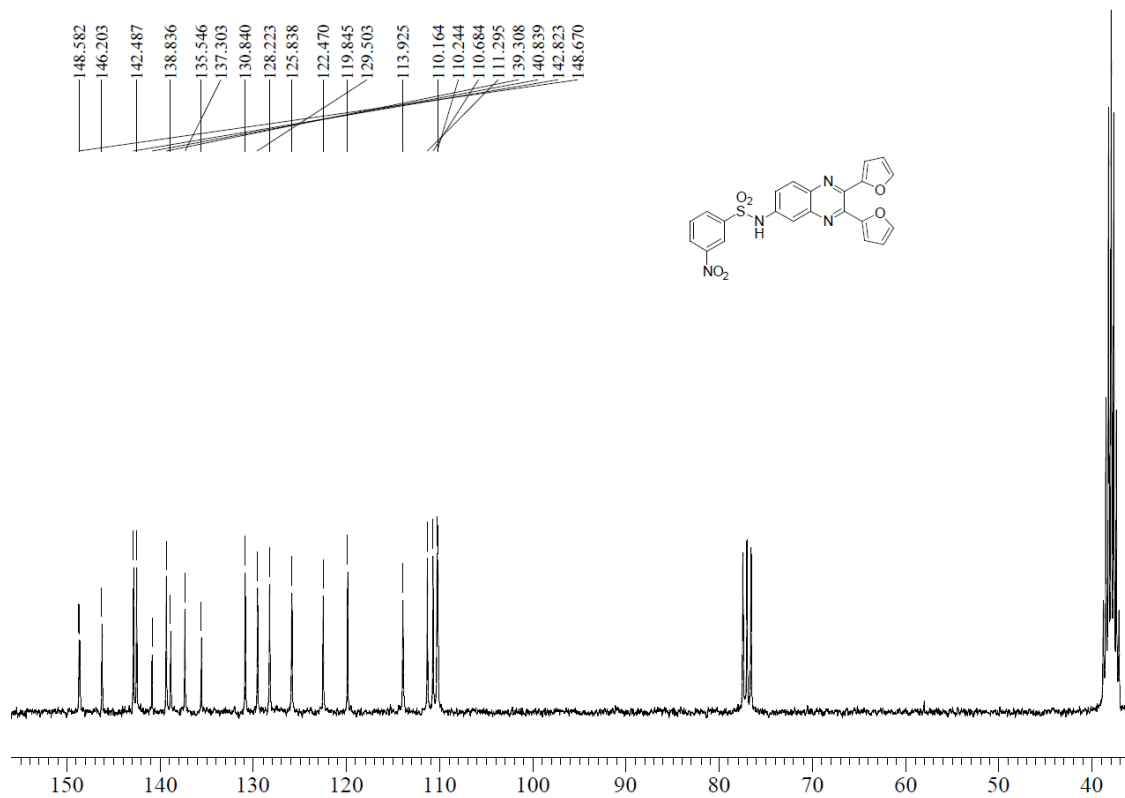

Supplement: c4ra08615e1.pdf [file c4ra08615e1.pdf]
